# Effect of Treatment, during Primary Infection, on Establishment and Clearance of Cellular Reservoirs of HIV-1

Matthew C. Strain,<sup>1,2</sup> Susan J. Little,<sup>3</sup> Eric S. Daar,<sup>5</sup> Diane V. Havlir,<sup>6</sup> Huldrych F. Günthard,<sup>8</sup> Ruby Y. Lam,<sup>2</sup> Otto A. Daly,<sup>4</sup> Juin Nguyen,<sup>4</sup> Caroline C. Ignacio,<sup>4</sup> Celsa A. Spina,<sup>4</sup> Douglas D. Richman,<sup>2,4</sup> and Joseph K. Wong<sup>2,4,7</sup>

Departments of <sup>1</sup>Physics and <sup>2</sup>Medicine and Pathology, University of California at San Diego, La Jolla, <sup>3</sup>Antiviral Research Center and <sup>4</sup>Veterans Affairs San Diego Healthcare System, San Diego, <sup>5</sup>Division of HIV Medicine, Harbor-University of California at Los Angeles (UCLA) Medical Center, Torrance, and UCLA School of Medicine, Los Angeles, and <sup>6</sup>San Francisco General Hospital and <sup>7</sup>Veterans Affairs Medical Center, San Francisco, California; <sup>8</sup>Division of Infectious Diseases and Hospital Epidemiology, University Hospital of Zürich, Zürich, Switzerland

(See the editorial commentary by Blankson et al., on pages 1394–6.)

Patients in whom virologic suppression is achieved with highly active antiretroviral therapy (HAART) retain long-lived cellular reservoirs of human immunodeficiency virus type 1 (HIV-1); this retention is an obstacle to sustained control of infection. To assess the impact that initiating treatment during primary HIV-1 infection has on this cell population, we analyzed the decay kinetics of HIV-1 DNA and of infectivity associated with cells activated *ex vivo* in 27 patients who initiated therapy before or <6 months after seroconversion and in whom viremia was suppressed to <50 copies/mL. The clearance rates of cellular reservoirs could not be distinguished by these techniques (median half-life, 20 weeks) during the first year of HAART. The clearance of HIV-1 DNA slowed significantly during the subsequent 3 years of treatment (median half-life, 70 weeks), consistent with heterogeneous cellular reservoirs being present. Total cell-associated infectivity (CAI) after 1 year of treatment was undetectable (<0.07 infectious units/million cells [IUPM]) in most patients initiating treatment during primary infection either before (9/9) or <6 months after (6/8) seroconversion. In contrast, all 17 control patients who initiated HAART during chronic infection retained detectable CAI after 3–6 years of treatment (median reservoir size, 1.1 IUPM;  $P < .0005$ ). These results suggest that treatment <6 months after seroconversion may facilitate long-term control of cellular reservoirs that maintain HIV-1 infection during treatment.

Treatment of HIV-1 infection with highly active antiretroviral therapy (HAART) suppresses plasma viremia to <50 copies/mL in many patients. However, sensitive assays have demonstrated that CD4<sup>+</sup> T cells retain replication-competent viral DNA and may be reactivated to produce virus even after years of viral suppression [1–3]. The elimination or control of this latent viral reservoir is thus an important goal in the refinement of long-term treatment strategies for HIV-1 infection

[4]. The CD4<sup>+</sup> T cell reservoir is established during primary infection [5, 6]. However, the slow turnover of latently infected cells during chronic infection [7, 8] suggests that this reservoir might continue to fill over months to years and thus might be smaller during primary infection. One patient treated before serocon-

Received 27 May 2004; accepted 1 November 2004; electronically published 29 March 2005.

Reprints or correspondence: Dr. Matthew C. Strain, Depts. of Medicine and Pathology, 0679, University of California at San Diego, 9500 Gilman Dr., La Jolla, CA 92093-0679 (mstrain@ucsd.edu) or Dr. Joseph K. Wong, VAMC San Francisco, 4150 Clement St., San Francisco, CA 94121 (joseph.wong2@med.va.gov).

The Journal of Infectious Diseases 2005;191:1410–8

© 2005 by the Infectious Diseases Society of America. All rights reserved. 0022-1899/2005/19109-0006\$15.00

Presented in part: 8th Conference on Retroviruses and Opportunistic Infections, Chicago, 8–9 February 2001 (abstract 503); 9th Conference on Retroviruses and Opportunistic Infections, Seattle, 24–28 February 2002 (abstract 97); 9th International Workshop on HIV Dynamics and Evolution, Arrowhead, CA, 17–20 March 2002.

Potential conflicts of interest: D.R.R. has consulted for Abbott, Bristol-Myers Squibb, Merck, Pfizer, and Roche.

Financial support: La Jolla Interfaces in Science (fellowship to M.C.S.); National Institutes of Health (grant GM 07198 to M.C.S.; grant AI51982 to D.V.H.; grants AI27670, AI38858, AI29164, and AI36214 to D.D.R.; and grant AI43752 to J.K.W.); Swiss National Science Foundation (grant 3345-062041 to H.F.G., M.F., and M.O.); Swiss HIV Cohort Study (support to H.F.G., M.F., and M.O.); Department of Veteran Affairs (Research Merit Award to J.K.W.); Research Center for AIDS and HIV Infection of the San Diego Veterans Affairs Healthcare System.

version had no detectable cell-associated infectivity (CAI) [9], which is consistent with a limited reservoir size at the time of seroconversion.

The clearance kinetics of the latent virus population after initiation of HAART in patients during chronic infection remains controversial. In a cohort initiating therapy during chronic infection, Finzi et al. estimated the half-life of the CD4<sup>+</sup> T cell latent reservoir to be 44 months [7]. Using a similar technique, Ramratnam et al. measured a half-life of 6 months in a cohort that included both chronically and acutely infected patients [8]. This shorter half-life suggests the possibility of eradication of HIV-1 from an infected patient by treatment with HAART. The discrepancy between these different measured clearance rates might be related to residual replication [8] or study duration [10], but it remains the subject of debate [11].

Although terminal dilution cocultures have been used to quantify cellular reservoirs of potentially infectious HIV-1, quantification of HIV-1 DNA level in peripheral blood mononuclear cells (PBMCs) provides a more sensitive alternate measure of reservoir size. Total HIV-1 DNA level has been shown to be stable throughout [12] and predictive of [13] disease progression, suggesting that it may be a useful marker for treatment decisions. After initial clearance of short- and long-lived productively infected cells [14], HIV-1 DNA is cleared with a half-life of 5–6 months in both chronic [14] and primary [15] infection. Whether the long-lived cells identified as containing HIV-1 DNA are dynamically related to the latent pool studied by quantitative coculture remains an important question.

The treatment of any patient identified with primary HIV-1 infection must be based on a rapid, individualized decision made on the basis of available information about potential long-term benefits and risks. Cumulative toxicity and the risk of developing or selecting for drug-resistant virus [16] argue against early treatment. Potential benefits to the patient include more-complete viral suppression [17] and long-term maintenance of HIV-1-specific CD4<sup>+</sup> [18] and CD8<sup>+</sup> [19, 20] T cell responses. Successful viral control has been observed when early treatment was followed by structured treatment interruptions in animal model studies [21, 22] and in humans [23, 24], although the duration of control varies. These results contrast notably with those of studies of therapy interruptions after treatment during chronic infection [25–28]. Thus, even if viral eradication by available therapies is not possible, there may nevertheless be significant benefits to early treatment.

A quantitative understanding of the dynamics of long-lived cellular reservoirs of HIV-1 in patients treated during primary HIV-1 infection may thus help refine long-term treatment regimens for HIV-1 infection. To assess the potential benefits of early treatment for the control of HIV-1 latency, we sought to extend previous results by comparing the size and clearance rate of the latent viral reservoir, as measured by both activated

coculture and HIV-1 DNA level, in patients initiating therapy at different stages of primary infection.

## PATIENTS AND METHODS

**Patient population.** Patients were recruited to primary-infection studies in San Diego and Los Angeles between 1996 and 1999, on the basis of clinical symptoms or exposure history [29]. A subgroup of these patients volunteered to enroll in the present study. All participants gave written, informed consent, in accordance with the requirements of the local institutional review board. All 28 patients who elected to receive treatment and in whom viremia was suppressed to <50 copies/mL in plasma, as determined by the Roche Amplicor Ultrasensitive assay, were included in this analysis. They received continuous suppressive drug therapy for the duration of this study. In some patients in whom viremia had been suppressed to <50 copies/mL, the reappearance of low (>50 and <200 copies/mL) but detectable levels of viremia (“blips,” or intermittent viremia) occurred episodically, as has previously been reported in chronically infected patients [24]. All patients were male and had homosexual contact as a primary risk factor. Patients initiating therapy while results of an HIV-1 ELISA were negative and results of a Western blot were negative, indeterminate, or evolving ( $\leq 4$  detectable bands) were designated as being “preseroconversion.” Patients initiating therapy later but while results of a detuned ELISA were still consistent with infection during the past 6 months (OD, <1.0) were defined as “postseroconversion.”

Fourteen patients who initiated HAART during chronic infection in clinical trial DMP266 [30] and 3 patients from clinical trial MRK035 [29] were also included, for cross-sectional comparison. These patients were also predominantly male but, as a group, had lower CD4<sup>+</sup> T cell counts and plasma HIV-1 RNA levels at the time of treatment (median, 260 cells/mm<sup>3</sup> and 4.78 log copies/mL, respectively).

**HIV-1 DNA assays.** PBMCs were extracted and then assayed for total HIV-1 DNA level by use of the Roche Monitor DNA assay [31]. Copy numbers per CD4<sup>+</sup> T cell were computed using flow-activated cell (FAC) counts of the proportion of CD4<sup>+</sup> T cells in a sample drawn simultaneously.

**Coculture assays.** Seventeen patients who agreed to donate the larger (80–160 mL) blood volumes necessary were prospectively enrolled in a protocol to quantify CAI. Recovery of virus from resting CD4<sup>+</sup> T cells was accomplished by an ex vivo activation procedure [1, 32]. Either Rosette Sep (Stem Cell Technologies) or VarioMacs (Miltenyi-Biotec) was employed, in accordance with the manufacturers’ instructions, to isolate CD4-enriched patient T cells and CD8-depleted donor cells by negative selection. Cells were then stimulated with immobilized anti-CD3 (Pharmingen) and interleukin (IL)–2. FAC analysis indicated that <2% of the remaining cells were CD8<sup>+</sup> or CD14<sup>+</sup>, and, typically, >85% were CD4<sup>+</sup>. For each assay, CD8-depleted

cells pooled from at least 2 healthy control donors were activated with phytohemagglutinin (Sigma) and IL-2.

Cultures were performed with  $1 \times 10^4$ – $3 \times 10^6$  cells/well in a 3-fold dilution series. Each cell dilution was assayed in quadruplicate. Fresh media and fresh activated donor PBMCs were added weekly, and supernatants were assayed for p24 by ELISA at days 7, 14, and 21. In 3 patients in whom no virus was detected in any well, 300 mL of whole blood was analyzed according to the above procedure, and 6–9 replicates of  $3 \times 10^6$  cells were available. The assay sensitivity varied from 0.03 to 0.05 infectious units/million CD4<sup>+</sup> T cells (IUPM) for these samples.

To assess the ability of this assay to reliably detect low levels of CAI, the same coculture procedure was used for 17 patients who had initiated HAART during chronic infection and in whom viremia had been suppressed to <50 copies/mL for 3–6 years. Dilution series used for these samples varied, but most included 24 replicates of  $1 \times 10^5$  cells. The limit of detection in these assays was 0.17–0.40 IUPM.

**Statistical methods.** CAI was quantified as IUPM by use of a maximum-likelihood method, under an assumption of single-hit Poisson kinetics [33]. The sensitivity limit was defined as the maximum-likelihood estimate for an assay with 1 additional positive well at the lowest dilution (0.07 IUPM for a quadruplicate assay with wells containing  $3 \times 10^6$  patient cells each). Viral reservoir sizes at 1 year were estimated by interpolating or extrapolating from available measurements, under an assumption of exponential decay after 4 weeks of treatment. When no decay rate could be measured in a given patient, the population median decay rate was assumed. Statistical comparison between groups, however, was based on a Mann-Whitney *U* test using only measured values (with undetectable values imputed as 0.07 IUPM). Total body viral reservoir sizes were estimated by assuming that peripheral blood CD4<sup>+</sup> T cells were in equilibrium with  $1.5 \times 10^{11}$  total CD4<sup>+</sup> T cells [34].

CAI clearance rates and reservoir sizes for individual patients were estimated using a maximum-likelihood fit under an assumption of log-normal errors. Clearance rates of HIV-1 DNA were estimated by least-squares minimization. Data before week 4 were excluded from all longitudinal analyses. Decay rates could be estimated in only 12 patients. In 5 patients, all in the preseroconversion cohort, CAI became undetectable by the first time point after 4 weeks, which prevented a quantitative rate estimate. Analyses were also performed with all data from before week 12 excluded; all group differences reported as significant were unaffected by this choice of start time. HIV-1 DNA clearance rates during the first year and subsequent years were compared using a paired Wilcoxon test. Correlations were computed using the Pearson correlation coefficient, and their significance was tested using a Wilcoxon rank-sum test.

## RESULTS

**Baseline characteristics of the patient population.** Of 40 original study subjects, 30 consented to high-volume blood draws for CAI studies, whereas 10 provided lower-volume blood donations suitable only for HIV-1 DNA measurements. An additional 14 patients were subsequently excluded from the study, either because they did not initiate HAART or sustain suppression ( $n = 10$ ) or because of insufficient follow-up ( $n = 4$ ).

Baseline characteristics of the patients who finally qualified for the study are given in table 1. There were no significant differences in pretreatment CD4<sup>+</sup> T cell counts, HIV-1 DNA copy number per microgram of PBMC DNA, or CAI between the preseroconversion and postseroconversion cohorts ( $P > .5$  in all cases), nor was there a major difference in the proportion of patients exhibiting intermittent viremia between the 2 cohorts (5/13 in the preseroconversion cohort; 6/14 in the postseroconversion cohort). The frequency of intermittent viremia in these patients was in line with those reported in the study of chronically infected patients receiving HAART [35]. The median pretreatment HIV-1 RNA level was higher in patients treated before seroconversion (>500,000 copies/mL) than in patients treated after seroconversion (190,000 copies/mL), but the baseline viral load did not differ significantly between cohorts ( $P = .31$ ).

**CAI clearance during the first year of HAART.** CAI decayed rapidly during the first month of therapy, as reported elsewhere [36]. Decay of CAI was therefore measured beginning at week 4 of treatment, before which the majority of both productively infected cells and any cells in a preintegration form of latency would have cleared. The median half-lives in the preseroconversion and postseroconversion cohorts were 14 weeks and 20 weeks, respectively; this difference did not approach statistical significance ( $P = .8$ ). The median half-life in the combined primary-infection cohort after week 4 of HAART was 20 weeks; excluding all data collected before week 12 did not affect this estimate (figure 1).

**HIV-1 DNA clearance during the first year of HAART.** HIV-1 DNA assays were performed longitudinally on 23 patients (table 1). In 8 of these patients, banked PBMC samples were analyzed retrospectively for 3–4 years after initiation of HAART. During the first year, HIV-1 DNA decayed with a median half-life of 30 weeks (range, 10–110 weeks; figure 2). Because CD4<sup>+</sup> T cell counts recovered substantially during the first year of treatment, the clearance of HIV-1 DNA per CD4<sup>+</sup> T cell was significantly faster than clearance per PBMC. The median half-life of HIV-1 DNA in this normalization was 18 weeks in both treatment cohorts (table 2).

**Nonlinear kinetics of HIV-1 DNA clearance.** Analysis of the 9 patients with longer follow-up demonstrated that decay of HIV-1 DNA was not simply exponential during the 4-year treatment period (figure 3). In the 8 patients followed after the first year,

**Table 1. Summary of baseline patient characteristics.**

| Time of initiation of treatment, patient ID | Baseline CD4 <sup>+</sup> T cell count, cells/ $\mu$ L | Baseline log <sub>10</sub> HIV-1 RNA level, copies/mL | Baseline HIV-1 DNA level, copies/ $\mu$ g | Baseline coculture infectivity, IUPM | HAART regimen           | Blip |
|---------------------------------------------|--------------------------------------------------------|-------------------------------------------------------|-------------------------------------------|--------------------------------------|-------------------------|------|
| Before seroconversion                       |                                                        |                                                       |                                           |                                      |                         |      |
| 001                                         | 687                                                    | >5.7                                                  | NA                                        | 110                                  | D4T, 3TC, ABC, NVP, HU  | No   |
| 002                                         | 45                                                     | >5.7                                                  | NA                                        | 45                                   | D4T, DDI, NFV           | Yes  |
| 004                                         | 847                                                    | 5.3                                                   | 34                                        | NA                                   | AZT, 3TC, IDV           | No   |
| 009                                         | 468                                                    | 5.2                                                   | NA                                        | 110                                  | D4T, 3TC, NFV           | Yes  |
| 017                                         | 1521                                                   | 4.0                                                   | 15                                        | 3.2                                  | D4T, 3TC, APV           | No   |
| 019                                         | 185                                                    | >5.7                                                  | 144                                       | 2.02                                 | D4T, 3TC, NFV           | No   |
| 020                                         | 497                                                    | >5.7                                                  | 298                                       | 37.3                                 | AZT, 3TC, ABC           | No   |
| 021                                         | 637                                                    | 4.2                                                   | 171                                       | 13.7                                 | D4T, 3TC, ABC, NVP      | Yes  |
| 044                                         | 408                                                    | >5.7                                                  | 355                                       | NA                                   | AZT, 3TC, NFV           | No   |
| 045                                         | 291                                                    | 5.3                                                   | 547                                       | NA                                   | ABC, APV                | Yes  |
| 056                                         | 909                                                    | 3.7                                                   | 120                                       | NA                                   | EFV, IDV                | Yes  |
| 178                                         | 474                                                    | 4.2                                                   | 1466                                      | 15.7                                 | 3TC, D4T, ABC, RTV, APV | No   |
| 404                                         | 1031                                                   | >5.7                                                  | NA                                        | 57                                   | AZT, 3TC, NFV           | No   |
| After seroconversion                        |                                                        |                                                       |                                           |                                      |                         |      |
| 003                                         | 605                                                    | 5.0                                                   | 60                                        | NA                                   | AZT, 3TC, IDV           | No   |
| 013                                         | 304                                                    | 5.3                                                   | NA                                        | 110                                  | AZT, 3TC, ABC           | No   |
| 022                                         | 785                                                    | >5.7                                                  | NA                                        | NA                                   | D4T, 3TC, LPV, RTV      | Yes  |
| 031                                         | 1048                                                   | >5.7                                                  | 17                                        | NA                                   | AZT, ddC, LPV, RTV      | Yes  |
| 054                                         | 427                                                    | >5.7                                                  | 188                                       | NA                                   | AZT, 3TC, NFV           | Yes  |
| 063                                         | 344                                                    | 5.1                                                   | 236                                       | NA                                   | 3TC, D4T, NFV           | No   |
| 065                                         | 305                                                    | 5.3                                                   | 2439                                      | NA                                   | AZT, 3TC, NFV           | Yes  |
| 118                                         | 593                                                    | 4.7                                                   | 124                                       | 110                                  | DDI, D4T, EFV, NFV      | Yes  |
| 122                                         | 348                                                    | 5.0                                                   | 247                                       | 44                                   | AZT, 3TC, ABC, APV      | No   |
| 125                                         | 426                                                    | 5.3                                                   | 451                                       | 1.1                                  | 3TC, AZT, ABC, APV      | Yes  |
| 133                                         | 230                                                    | 3.6                                                   | 1422                                      | NA                                   | AZT, 3TC, ABC, APV      | No   |
| 135                                         | 542                                                    | >5.7                                                  | 65                                        | 1.57                                 | AZT, 3TC, RTV, IDV      | No   |
| 143                                         | 596                                                    | 5.5                                                   | 233                                       | 9.5                                  | DDI, D4T, EFV, NFV      | No   |
| 185                                         | 528                                                    | >5.7                                                  | 47                                        | NA                                   | 3TC, D4T, ABC, RTV, APV | No   |
| Median (all patients)                       | 486                                                    | 5.3                                                   | 180                                       | 16                                   |                         |      |
| Median (before seroconversion)              | 497                                                    | >5.7                                                  | 157                                       | 16                                   |                         |      |
| Median (after seroconversion)               | 468                                                    | 5.3                                                   | 211                                       | 27                                   |                         |      |

**NOTE.** ABC, abacavir; APV, amprenavir; AZT, zidovudine; ddC, zalcitabine; DDI, didanosine; D4T, stavudine; EFV, efavirenz; HAART, highly active antiretroviral therapy; HU, hydroxyurea; IDV, indinavir; IUPM, infectious units per million cells; LPV, lopinavir; NA, not available; NFV, nelfinavir; NVP, nevirapine; RTV, ritonavir; 3TC, lamivudine.

the median decay of HIV-1 DNA per unit of PBMC DNA was  $-0.0093$  per week (range,  $-0.024$  to  $0.0005$  per week), corresponding to a half-life of 70 weeks. The median decay of HIV-1 DNA per CD4<sup>+</sup> T cell was  $-0.012$  per week (range,  $-0.026$  to  $-0.0002$  per week), corresponding to a half-life of 60 weeks. In both normalizations, DNA clearance was significantly slower ( $P < .001$ ) after the first year than between weeks 4 and 48 of treatment. Thus, DNA decay was estimated independently for the first year (weeks 4–48) and for subsequent years.

**Residual cellular reservoirs of HIV-1.** The total size of the latent CD4<sup>+</sup> T cell reservoir after 1 year of treatment could not be directly measured in the primary-infection cohort. Specifically, virus eventually could no longer be recovered from any of the 9 patients who were treated before seroconversion. The treatment duration at which CAI fell below the assay threshold varied from 4 to 62 weeks. By direct measurement, we found

that the reservoir size was  $<0.07$  IUPM in all patients who initiated HAART before seroconversion and in 6 of 8 patients who initiated HAART  $<6$  months after seroconversion. Extrapolated estimates of the reservoir size indicated median reservoir sizes of 0.03 IUPM and 0.09 IUPM, in the pre- and postseroconversion cohorts, respectively.

Among 36 samples taken from 17 chronically infected patients after 3–6 years of virologic suppression, the same activation protocol resulted in virus detection in 30 samples, despite examination of typically fewer cells from these patients. At least 1 sample from each patient retained detectable CAI. The median CAI was 1.1 IUPM, which was significantly higher than in patients treated before ( $P = .00002$ ) or  $<6$  months after ( $P = .0005$ ) seroconversion.

The total number of replication-competent latently infected cells was also estimated for each patient (figure 4). For patients

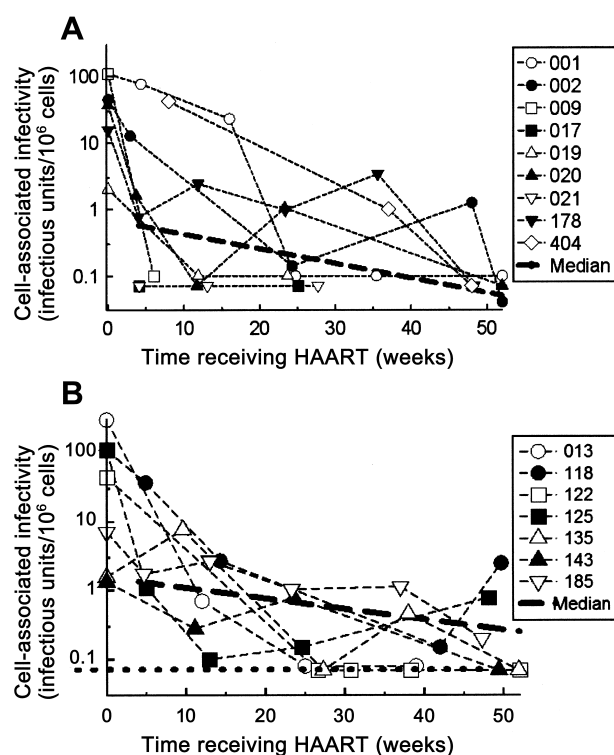

**Figure 1.** Decay of cell-associated infectivity (CAI). After an initial rapid decline during the first month of highly active antiretroviral therapy (HAART), CAI decayed with a median half-life of 14 weeks in patients who initiated HAART before seroconversion (*A*) and 20 weeks in patients who initiated HAART <6 months after complete seroconversion (*B*). By the end of the first year of treatment, CAI had fallen below the level of detection (*red dashed line*) in 12 patients, including all 9 acutely infected patients shown in panel *A*. Black dashed lines show the median decay slope and median residual CAI (table 2).

in the pre- and postseroconversion cohorts, reservoir sizes after 48 weeks of HAART were estimated as described in Patients and Methods. Reservoir sizes in patients who initiated treatment during chronic infection were estimated at the time of collection of available samples, after 3–6 years of HAART. The median estimated reservoir sizes were 4000 cells for patients who initiated therapy before seroconversion, 13,000 cells for patients who initiated therapy <6 months after seroconversion, and 160,000 cells for chronically infected patients.

## DISCUSSION

Sustained control of cellular reservoirs of HIV-1 remains an important goal in the development of antiretroviral therapies. Although estimates of the duration of HAART that is required to eradicate the latently infected cell population from chronically infected patients extend into decades [7], treatment early during infection might limit the establishment or alter the clearance kinetics of this population. We investigated both of these

hypotheses by longitudinally following patients initiating therapy before and soon after seroconversion.

After 1 year of treatment, replication-competent virus could not be detected (<0.07 IUPM) in 9 of 9 patients who initiated HAART before seroconversion or in 6 of 8 patients who initiated HAART <6 months after seroconversion. We assume that the lack of recovery of viable virus did not indicate the absence of latently infected cells *in vivo* but reflected their relative infrequency in these patients and blood-volume limits. Two patients who initiated therapy during early infection harbored intermediate numbers of latently infected cells, which is consistent with previous reports of detectable cellular reservoirs in patients treated during primary infection [5, 9]. Larger reservoirs (median, 1.1 IUPM), consistent with previous measurements [6, 7], were observed in patients treated for an average of 6 years after therapy initiation during chronic HIV-1 infec-

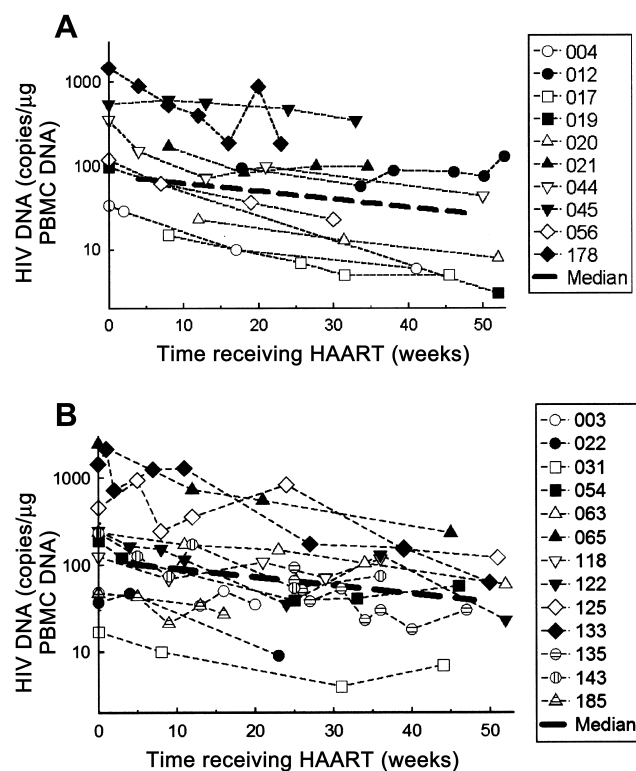

**Figure 2.** Decay of HIV-1 DNA during the first year of highly active antiretroviral therapy (HAART). During the first year of HAART, HIV-1 DNA in peripheral blood mononuclear cells (PBMCs) was cleared with a median half-life of 30 weeks, with no significant difference between patients initiating treatment before (*A*) or after (*B*) seroconversion. This estimated half-life is in line with published estimates for both chronic [14] and acute [15] infection. When normalized to CD4<sup>+</sup> T cell counts, HIV-1 DNA clearance is faster (median half-life, 18 weeks) because of CD4<sup>+</sup> T cell recovery on HAART. After initial clearance of labile molecular forms of HIV-1, the kinetics of DNA in this latter normalization were indistinguishable from the kinetics of infectivity (figure 1), suggesting that viral DNA dynamics parallel the dynamics of replication-competent virus.

**Table 2. Summary of cellular reservoir size and clearance characteristics.**

| Time of initiation of treatment, patient ID | Baseline HIV-1 DNA level, copies/ $\mu$ g | Decay constant (per week) |                                       |             | Residual size at week 48 |                                  |
|---------------------------------------------|-------------------------------------------|---------------------------|---------------------------------------|-------------|--------------------------|----------------------------------|
|                                             |                                           | HIV-1 DNA                 | HIV-1 DNA/<br>CD4 <sup>+</sup> T cell | Infectivity | Infectivity, IUPM        | HIV-1 DNA level, copies/ $\mu$ g |
| Before seroconversion                       |                                           |                           |                                       |             |                          |                                  |
| 001                                         | ...                                       | ...                       | ...                                   | -0.12       | 0.03                     | ...                              |
| 002                                         | ...                                       | ...                       | ...                                   | 0.0003      | 0.106                    | ...                              |
| 004                                         | 34                                        | -0.0421                   | -0.0374                               | ...         | ...                      | 4                                |
| 009                                         | ...                                       | ...                       | ...                                   | ND          | 0.015                    | ...                              |
| 017                                         | 15                                        | -0.0308                   | -0.0484                               | ND          | 0.015                    | 4                                |
| 019                                         | 144                                       | 0.01183                   | ...                                   | ...         | 0.02                     | 10                               |
| 020                                         | 298                                       | -0.02177                  | -0.03                                 | -0.033      | 0.114                    | 11                               |
| 021                                         | 171                                       | -0.0178                   | -0.0293                               | ND          | 0.015                    | 68                               |
| 044                                         | 355                                       | -0.0231                   | -0.0258                               | ...         | ...                      | 42                               |
| 045                                         | 547                                       | -0.0209                   | -0.0387                               | ...         | ...                      | 269                              |
| 056                                         | 120                                       | -0.0421                   | -0.0493                               | ...         | ...                      | 11                               |
| 178                                         | 1466                                      | -0.05219                  | -0.0812                               | -0.069      | 0.07                     | 71                               |
| 404                                         | ...                                       | ...                       | ...                                   | -0.151      | 0.07                     | ...                              |
| After seroconversion                        |                                           |                           |                                       |             |                          |                                  |
| 003                                         | 60                                        | -0.0248                   | -0.0244                               | ND          | ...                      | 18                               |
| 013                                         | ...                                       | ...                       | ...                                   | -0.17       | 0.031                    | ...                              |
| 022                                         | ...                                       | -0.06899                  | ...                                   | ND          | 0.015                    | 4                                |
| 031                                         | 17                                        | -0.021                    | -0.0423                               | ...         | ...                      | 5                                |
| 054                                         | 188                                       | -0.0191                   | -0.0241                               | ...         | ...                      | 38                               |
| 063                                         | 236                                       | -0.0125                   | -0.0119                               | ...         | ...                      | 82                               |
| 065                                         | 2439                                      | -0.0354                   | -0.0435                               | ...         | ...                      | 205                              |
| 118                                         | 124                                       | 0.013406                  | -0.0063                               | -0.139      | 0.08                     | 120                              |
| 122                                         | 247                                       | -0.0183                   | -0.0381                               | -0.011      | 0.034                    | 37                               |
| 125                                         | 451                                       | -0.027817                 | -0.0404                               | 0.0148      | 0.78                     | 151                              |
| 133                                         | 1422                                      | -0.07486                  | -0.0772                               | ...         | ...                      | 67                               |
| 135                                         | 65                                        | -0.04975                  | -0.1105                               | -0.047      | 0.25                     | 18                               |
| 143                                         | 233                                       | -0.019398                 | -0.0239                               | -0.035      | 0.07                     | 51                               |
| 185                                         | 47                                        | -0.0231                   | -0.0726                               | -0.031      | 0.34                     | 13                               |
| Median (all patients)                       | 180                                       | -0.022                    | -0.038                                | -0.035      | 0.033                    | 38                               |
| Median (before seroconversion)              | 211                                       | -0.022                    | -0.039                                | -0.035      | 0.087                    | 38                               |
| Median (after seroconversion)               | 157                                       | -0.022                    | -0.037                                | -0.051      | 0.025                    | 27                               |

**NOTE.** Ellipses (...) indicate that no sample was available. IUPM, infectious units per million cells; ND, not determined because  $\leq 2$  cocultures after week 4 contained detectable infectivity.

tion. If we assume that proportionality between peripheral blood T cells and tissue T cells [37] is established early during infection [38], these measurements suggest a median of only 5000 latently infected CD4<sup>+</sup> T cells in patients initiating HAART <6 months after seroconversion. In chronically infected patients, this median was >160,000 cells after several years of treatment, which is consistent with previous estimates [6, 7]. These results demonstrate that early treatment limits the size of the latent reservoir, as suggested by a previous cross-sectional study [9].

The first year of treatment resulted in a significant clearance of cellular reservoirs of HIV-1. During primary HIV-1 infection, patients may have a greater proportion of infected cells responding specifically to HIV-1 antigens [39]; these cells would encounter their cognate antigens frequently, resulting in rapid cell turnover. Previous studies have also demonstrated an elevated state of immune activation in primary HIV-1 infection

[40–43], suggesting that cell clearance might be enhanced by nonspecific activation. Alternatively, immune clearance of infected cells by HIV-1–specific cytotoxic T lymphocytes (CTLs), which are preserved by early initiation of HAART [18, 20], might more effectively contribute to clearance. Finally, the smaller observed reservoir sizes in patients treated during primary infection could represent a more profound inhibition of viral replication [45, 53] in such patients, as is supported by one study of residual viremia in patients treated during primary infection [57]. However the proportion of patients with intermittent viremia (“blips”)—a surrogate for residual viral replication—who started treatment before and after seroconversion was no different from proportions reported in studies of chronically infected patients [24].

Because CAI was undetectable by the end of the first year in a majority of patients with primary infection, subsequent

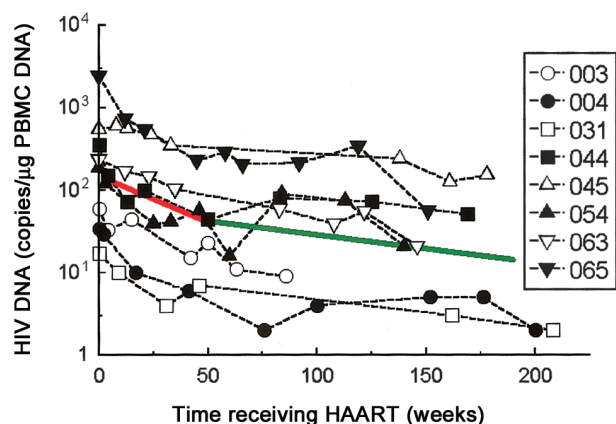

**Figure 3.** Slower-than-exponential decay of HIV-1 DNA during the first 4 years of highly active antiretroviral therapy (HAART). Clearance during the first year occurred with a median half-life of 30 weeks in both the preseroconversion (figure 2A) and postseroconversion (figure 2B) cohorts. At the end of the first year, HIV-1 DNA was not significantly different between the 2 groups. A subgroup of 8 patients with longer follow-up is shown above. The decay kinetics during the first year (red) are statistically indistinguishable from those of the entire cohort. During the 4-year period shown, clearance of HIV-1 DNA was not simply exponential, with significantly slower clearance ( $P = .001$ ) during the subsequent 3 years (green) of suppressive therapy (median half-life, 70 weeks). These nonlinear kinetics might be due to heterogeneity of cellular reservoirs [10], so that clearance progressively selects for the most-stable latent cells.

quantification was based on HIV-1 DNA level, a more sensitive measure of the population size of cellular reservoirs. The relationship between HIV-1 DNA level and CAI, both of which are measures of the size of the cellular reservoir of HIV-1, is not well understood. During antiretroviral therapy, the majority of HIV-1 DNA in infected cells is integrated into the host genome [44]. However, unintegrated linear and circular forms of HIV-1 DNA are also present. Although the former are short lived, the latter may be very stable [45–47] but represent a small minority of the total HIV-1 DNA [9].

Our results provide empirical evidence that HIV-1 DNA level can serve as a useful measure of the dynamics of CAI after the initial month of therapy. We observed a rapid decline in CAI during the first month of treatment, with no parallel decline in HIV-1 DNA level (figure 1). This is consistent with the existence of a subset of cells with labile, unintegrated, full-length HIV-1 DNA, previously estimated to have a functional half-life of 6 days [36], provided that these unintegrated molecular forms are, on average, more likely to give rise to productive infection than are integrated HIV-1 genomes during the period immediately after initiation of suppressive therapy. Because our coculture assays were performed on CD4-enriched cells, the clearance rates of HIV-1 DNA per CD4<sup>+</sup> T cell were computed for comparison. During weeks 4–48 of HAART, the median decay half-lives of HIV-1 DNA and CAI were the same (20 weeks). The parallel

kinetics of HIV-1 DNA and CAI suggest that HIV-1 DNA level may provide a convenient marker of the cellular reservoir of virus after approximately the fourth week of treatment and that the proportion of HIV-1 DNA genomes that are replication competent remains stable through this period.

Previous studies of the dynamics of HIV-1 latency have been performed under the assumption that the clearance of this reservoir was exponential [7, 8]. However, we found that the clearance rates of HIV-1 DNA declined substantially after the first year of treatment. This is consistent with the findings of a study reporting that cellular reservoirs of HIV-1 contain cells that clear at different rates [10]. In 8 patients followed for 3–4 years, the median half-life of DNA (per CD4<sup>+</sup> T cell) after the first year of HAART was 60 weeks, which was statistically different ( $P = .003$ ) from the 20-week half-life observed in the same patients during the first year. This difference did not reflect a change in the degree of viral suppression, since all patients retained plasma HIV-1 RNA levels <50 copies/mL throughout the study. This range of values is consistent with those from previous studies of both chronic and primary infection [6, 14, 15]. The change in clearance kinetics might reflect decreasing activation rates after viral suppression [48]. Alternatively, cells

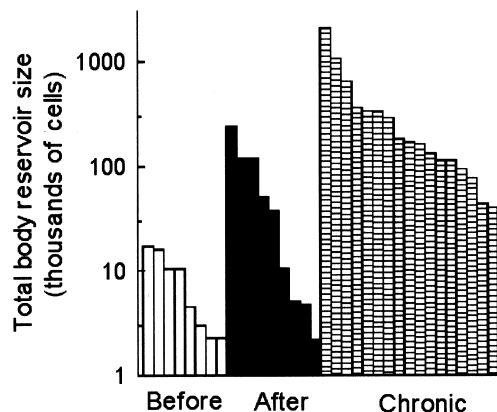

**Figure 4.** Attenuation of residual cellular reservoirs of culturable HIV-1 by initiation of highly active antiretroviral therapy (HAART) during primary infection. Patients treated either before or <6 months after seroconversion harbored smaller reservoirs of recoverable HIV-1 after 1 year of HAART than did patients treated with HAART for 3–6 years after initial treatment during chronic infection. In samples from the majority of patients with primary infection (9/9 in the preseroconversion cohort and 6/8 in the postseroconversion cohort), infectious virus could no longer be cultured by the end of the study period; the values shown were extrapolated to week 48 of HAART, by use of the population median clearance. Replication-competent virus was recovered from all 17 chronically infected control individuals shown, despite a less sensitive assay and 2–5 additional years of suppressive HAART (chronic vs. preseroconversion,  $P = .00002$ ; chronic vs. postseroconversion,  $P = .0005$ ). Thus, establishment of long-lived cellular reservoirs of HIV-1 begins before seroconversion but occurs predominantly >6 months after seroconversion.

recognizing common antigens may be preferentially activated and cleared during the first year, leaving latently infected memory cells that recognize rarely encountered antigens to activate slowly in subsequent years [10, 49]. The different dynamics of phenotypically distinct populations of long-lived cells, including memory T cells, naive T cells [50], thymocytes, and other cell types [51–53], might also contribute to the decline in clearance.

Although our results do not address the mechanism underlying changing HIV-1 DNA clearance rates, they suggest that the rapid clearance of CAI during the first year may not be sustained thereafter. If CAI kinetics continues to parallel that of HIV-1 DNA at the rate observed after the first year, spontaneous clearance of the reservoir would require ~15 years of HAART, even for patients initiating HAART before seroconversion. The observation that DNA clearance decreases during the first few years of HAART, however, suggests the possibility that this deceleration continues, which is consistent with dynamically heterogeneous cellular reservoirs being present [10]. Progressively decelerating clearance [49] might explain why previous studies of chronic infection have found variable half-lives [7, 8], with longer half-lives associated with longer follow-up [54]. If clearance continues to slow through subsequent years of infection, even the small cellular reservoirs we observed would not be eradicated in a patient's lifetime. If, as has been proposed, the latent reservoir is responsible for viral rebound during therapy interruption [25], this small reservoir size may explain the delayed rebound during interruptions in patients with primary infection [24, 55].

Although eradication of infection appears unachievable with currently available treatment, the difference in reservoir characteristics for patients treated early during primary infection may nonetheless be significant. Novel strategies designed to mobilize virus from resting CD4<sup>+</sup> T cells [56] or immune modulation strategies, such as therapeutic vaccination [57], may have the greatest likelihood of success in patients treated early enough to both limit the extent of cellular reservoirs and preserve antiviral immune function. The high degree of suppression and limitation of reservoir size seen in this primary-infection cohort may enhance the long-term durability of treatment responses, since higher levels of viral production have been reported to result in the acquisition of some drug-resistance mutations, even in patients generally responding to potent therapy [59]. Latently infected cells may be an important source of residual infectious virus during sustained [58] and interrupted treatment. Thus, smaller reservoirs may facilitate the use of simplified maintenance regimens [59] or planned treatment interruptions, reducing the toxicity and cost of long-term antiretroviral therapy. Thus, initiation of HAART during primary infection may increase patients' future options for long-term control of HIV-1 infection.

## Acknowledgments

We thank the participating patients; Sharon Wilcox, Doric Smith, and Roma Sysyn, for administrative support; Linda Meixner, Kathy Nuffer, Christina Grube, and Gary Dyak, for study coordination; and Cindy Christopherson, Shirley Kwok, Karen Young, and Roche Molecular Diagnostics, for reagents used in DNA quantitation.

## References

1. Wong JK, Hezareh M, Günthard HF, et al. Recovery of replication competent HIV despite prolonged suppression of plasma viremia. *Science* **1997**; 278:1291–5.
2. Finzi D, Hermankova M, Pierson T, et al. Identification of a reservoir for HIV in patients on highly active antiretroviral therapy. *Science* **1997**; 278:1295–300.
3. Chun TW, Carruth L, Finzi D, et al. Quantification of latent tissue reservoirs and total body viral load in HIV-1 infection. *Nature* **1997**; 387:183–8.
4. Pomerantz RJ. Residual HIV-1 infection during antiretroviral therapy: the challenge of viral persistence. *AIDS* **2001**; 15:1201–11.
5. Chun TW, Engel D, Berrey MM, Shea T, Corey L, Fauci AS. Early establishment of a pool of latently infected, resting CD4 T cells during primary HIV-1 infection. *Proc Natl Acad Sci USA* **1998**; 95:8869–73.
6. Zhang L, Ramratnam B, Tenner-Racz K, et al. Quantifying residual HIV-1 replication in patients receiving combination antiretroviral therapy. *N Engl J Med* **1999**; 340:1605–13.
7. Finzi D, Blankson J, Siliciano JD, et al. Latent infection of CD4<sup>+</sup> T cells provides a mechanism for lifelong persistence of HIV-1, even in patients on effective combination therapy. *Nat Med* **1999**; 5:512–7.
8. Ramratnam B, Mittler JE, Zhang L, et al. The decay of the latent reservoir of replication competent HIV-1 is inversely correlated with the extent of residual viral replication during prolonged anti-retroviral therapy. *Nat Med* **2000**; 6:82–5.
9. Lori F, Jessen H, Lieberman J, et al. Treatment of HIV infection with hydroxyurea, didanosine, and a protease inhibitor before seroconversion is associated with normalized immune parameters and a limited viral reservoir. *J Infect Dis* **1999**; 180:1827–32.
10. Strain MC, Günthard HF, Havlir DV, et al. Heterogeneous clearance rates of long-lived lymphocytes infected with HIV: intrinsic stability predicts lifelong persistence. *Proc Natl Acad Sci USA* **2003**; 100:4819–24.
11. Blankson JN, Persaud D, Siliciano RF. The challenge of viral reservoirs in HIV-1 infection. *Annu Rev Med* **2002**; 53:557–93.
12. Cone RW, Gowland P, Opravil M, Grob P, Ledergerber B, the Swiss AIDS Cohort. Levels of HIV-infected peripheral blood cells remain stable throughout the natural history of HIV-1 infection. *Swiss HIV Cohort Study. AIDS* **1998**; 12:2253–60.
13. Gottlieb GS, Sow PS, Hawes SE, et al. Equal plasma viral loads predict a similar rate of CD4<sup>+</sup> T cell decline in human immunodeficiency virus (HIV) type 1- and HIV-2-infected individuals from Senegal, West Africa. *J Infect Dis* **2002**; 185:905–14.
14. Perelson AS, Essunger P, Cao Y, et al. Decay characteristics of HIV-1 infected compartments during combination therapy. *Nature* **1997**; 387:188–91.
15. Yerly S, Perneger TV, Vora S, Hirschel B, Perrin L. Decay of cell-associated HIV-1 DNA correlates with residual replication in patients treated during acute HIV-1 infection. *AIDS* **2000**; 14:2805–12.
16. Little SJ, Holte S, Routy JP, et al. Antiretroviral-drug resistance among patients recently infected with HIV. *N Engl J Med* **2002**; 347:385–94.
17. Yerly S, Kaiser L, Perneger TV, et al. Time of initiation of antiretroviral therapy: impact on HIV-1 viraemia. *AIDS* **2000**; 14:243–9.
18. Rosenberg ES, Billingsley JM, Caliendo AM, et al. Vigorous HIV-1 specific CD4 T cell responses associated with control of viremia. *Science* **1997**; 278:1447–50.
19. Oxenius A, Price DA, Easterbrook PJ, et al. Early highly active anti-



- retroviral therapy for acute HIV-1 infection preserves immune function of CD8<sup>+</sup> and CD4<sup>+</sup> T lymphocytes. *Proc Natl Acad Sci USA* **2000**;97:3382–7.
20. Altfeld M, Rosenberg ES, Shankarappa R, et al. Cellular immune responses and viral diversity in individuals treated during acute and early HIV-1 infection. *J Exp Med* **2001**;193:169–80.
  21. Lori F, Lewis MG, Xu J, et al. Control of SIV rebound through structured treatment interruptions during early infection. *Science* **2000**;290:1591–3.
  22. Lifson JD, Rossio JL, Piatak M Jr, et al. Role of CD8<sup>+</sup> lymphocytes in control of simian immunodeficiency virus infection and resistance to rechallenge after transient early antiretroviral treatment. *J Virol* **2001**;75:10187–99.
  23. Lisiewicz J, Rosenberg E, Lieberman J, et al. Control of HIV despite the discontinuation of antiretroviral therapy. *N Engl J Med* **1999**;340:1683–4.
  24. Rosenberg ES, Altfeld M, Poon SH, et al. Immune control of HIV-1 after early treatment of acute infection. *Nature* **2000**;407:523–6.
  25. Zhang L, Chung C, Hu BS, et al. Genetic characterization of rebounding HIV-1 after cessation of highly active antiretroviral therapy. *J Clin Invest* **2000**;106:839–45.
  26. Oxenius A, McLean AR, Fischer M, et al. Human immunodeficiency virus-specific CD8<sup>+</sup> T-cell responses do not predict viral growth and clearance rates during structured intermittent antiretroviral therapy. *J Virol* **2002**;76:10169–76.
  27. Oxenius A, Price DA, Gunthard HF, et al. Stimulation of HIV-specific cellular immunity by structured treatment interruption fails to enhance viral control in chronic HIV infection. *Proc Natl Acad Sci USA* **2002**;99:13747–52.
  28. Ortiz GM, Wellons M, Brancato J, et al. Structured antiretroviral treatment interruptions in chronically HIV-1-infected subjects. *Proc Natl Acad Sci USA* **2001**;98:13288–93.
  29. Gulick RM, Mellors JW, Havlir D, et al. Treatment with a combination of indinavir, zidovudine and lamivudine in HIV-infected adults with prior antiretroviral use. *N Engl J Med* **1997**;337:734–9.
  30. Ruiz N, Riddler S, Dupont Merck Study Group. A double-blind pilot study to evaluate the antiretroviral activity, tolerability of DMP 266 in combination with indinavir (cohort III) [abstract LB2/206]. In: Program and abstracts of the 4th Conference on Retroviruses and Opportunistic Infections (Washington DC). Alexandria, VA: Foundation for Retrovirology and Human Health, **1997**.
  31. Christopherson C, Kidane Y, Conway B, Krowka J, Sheppard H, Kwok S. PCR-based assay to quantify human immunodeficiency virus type 1 DNA in peripheral blood mononuclear cells. *J Clin Microbiol* **2000**;38:630–4.
  32. Spina CA, Guatelli JC, Richman DD. Establishment of a stable, inducible form of HIV-1 DNA in quiescent CD4 lymphocytes in vitro. *J Virol* **1995**;69:2977–88.
  33. Taswell C. Limiting dilution assays for the determination of immunocompetent cell frequencies. I. Data analysis. *J Immunol* **1981**;126:1614–9.
  34. Haase AT. Population biology of HIV-1 infection: viral and CD4<sup>+</sup> T cell demographics and dynamics in lymphatic tissues. *Annu Rev Immunol* **1999**;17:625–6.
  35. Havlir DV, Bassett R, Gilbert P, et al. Prevalence and predictive value of intermittent viremia with combination HIV therapy. *JAMA* **2001**;286:224–6.
  36. Blankson JN, Finzi D, Pierson TC, et al. Biphasic decay of latently infected CD4<sup>+</sup> T cells in acute human immunodeficiency virus type 1 infection. *J Infect Dis* **2000**;182:1636–42.
  37. Haase AT, Henry K, Zapancic M, et al. Quantitative image analysis of HIV-1 infection in lymphoid tissue. *Science* **1996**;274:985–9.
  38. Schacker T, Little S, Connick E, et al. Rapid accumulation of human immunodeficiency virus (HIV) in lymphatic tissue reservoirs during acute and early HIV infection: implications for timing of antiretroviral therapy. *J Infect Dis* **2000**;181:354–7.
  39. Douek DC, Brenchley JM, Betts MR, et al. HIV preferentially infects HIV-specific CD4<sup>+</sup> T cells. *Nature* **2002**;417:95–8.
  40. Cossarizza A, Ortolani C, Mussini C, et al. Massive activation of immune cells with an intact T cell repertoire in acute human immunodeficiency virus syndrome. *J Infect Dis* **1995**;172:105–12.
  41. Barcellini W, Rizzardi GP, Poli G, et al. Cytokines and soluble receptor changes in the transition from primary to early chronic HIV type 1 infection. *AIDS Res Hum Retroviruses* **1996**;12:325–31.
  42. Carcelain G, Blanc C, Leibowitch J, et al. T cell changes after combined nucleoside analogue therapy in HIV primary infection. *AIDS* **1999**;13:1077–81.
  43. Kaufmann GR, Zaunders JJ, Cunningham P, et al. Rapid restoration of CD4 T cell subsets in subjects receiving antiretroviral therapy during primary HIV-1 infection. *AIDS* **2000**;14:2643–51.
  44. Donovan RM, Bush CE, Smereck SM, Baxa DM, Markowitz NP, Saravolatz LD. Rapid decrease in unintegrated HIV DNA after the initiation of nucleoside therapy. *J Infect Dis* **1994**;170:202–5.
  45. Butler SL, Johnson EP, Bushman FD. Human immunodeficiency virus cDNA metabolism: notable stability of two-long terminal repeat circles. *J Virol* **2002**;76:3739–47.
  46. Pierson TC, Kieffer TL, Ruff CT, Buck C, Gange SJ, Siliciano RF. Intrinsic stability of episomal circles formed during human immunodeficiency virus type 1 replication. *J Virol* **2002**;76:4138–44.
  47. Fischer M, Trkola A, Joos B, et al. Shifts in cell-associated HIV-1 RNA but not in episomal HIV-1 DNA correlate with new cycles of HIV-1 infection in vivo. *Antivir Ther* **2003**;8:97–104.
  48. Opravil M, Cone RW, Fischer M, et al. Effects of early antiretroviral treatment on HIV-1 RNA in blood and lymphoid tissue: a randomized trial of double versus triple therapy. Swiss HIV Cohort Study. *J Acquir Immune Defic Syndr* **2000**;23:17–25.
  49. Muller V, Viguera-Gomez JF, Bonhoeffer S. Decelerating decay of latently infected cells during prolonged therapy for human immunodeficiency virus type 1 infection. *J Virol* **2002**;76:8963–5.
  50. McBreen S, Imlach S, Shirafuji T, et al. Infection of the CD45RA<sup>+</sup> (naive) subset of peripheral CD8<sup>+</sup> lymphocytes by human immunodeficiency virus type 1 in vivo. *J Virol* **2001**;75:4091–102.
  51. Brooks DG, Kitchen SG, Kitchen CM, Scripture-Adams DD, Zack JA. Generation of HIV latency during thymopoiesis. *Nat Med* **2001**;7:459–64.
  52. Sonza S, Mutimer HP, Oelrichs R, et al. Monocytes harbour replication-competent, non-latent HIV-1 in patients on highly active antiretroviral therapy. *AIDS* **2001**;15:17–22.
  53. Valentin A, Rosati M, Patenaude DJ, et al. Persistent HIV-1 infection of natural killer cells in patients receiving highly active antiretroviral therapy. *Proc Natl Acad Sci USA* **2002**;99:7015–20.
  54. Siliciano JD, Kajdas J, Finzi D, et al. Long-term follow-up studies confirm the stability of the latent reservoir for HIV-1 in resting CD4<sup>+</sup> T cells. *Nat Med* **2003**;9:727–8.
  55. Ortiz GM, Nixon DF, Trkola A, et al. HIV-1-specific immune responses in subjects who temporarily contain virus replication after discontinuation of highly active antiretroviral therapy. *J Clin Invest* **1999**;104:R13–8.
  56. Kulkosky J, Pomerantz RJ. Approaching eradication of highly active antiretroviral therapy-persistent human immunodeficiency virus type 1 reservoirs with immune activation therapy. *Clin Infect Dis* **2002**;35:1520–6.
  57. Robbins GK, Addo MM, Troung H, et al. Augmentation of HIV-1-specific T helper cell responses in chronic HIV-1 infection by therapeutic immunization. *AIDS* **2003**;17:1121–6.
  58. Grossman Z, Feinberg MB, Paul WE. Multiple modes of cellular activation and virus transmission in HIV infection: a role for chronically and latently infected cells in sustaining viral replication. *Proc Natl Acad Sci USA* **1998**;95:6314–9.
  59. Flandre P, Peytavin G, Meiffredy V, et al. Adherence to antiretroviral therapy and outcomes in HIV-infected patients enrolled in an induction/maintenance randomized trial. *Antivir Ther* **2002**;7:113–21.
